# Supplementary material
Source: PubMed Central journal article supplement (PMC7118244)
Supplement: mmc1.pdf [file mmc1.pdf]

# Associations Among 25-Hydroxyvitamin D Levels, Lung Function, and Exacerbation Outcomes in COPD

## An Analysis of the SPIROMICS Cohort

*Robert M. Burkes, MD; Agathe S. Ceppe, MS; Claire M. Doerschuk, MD; David Couper, PhD; Eric A. Hoffman, PhD; Alejandro P. Comellas, MD; R. Graham Barr, MD, PhD; Jerry A. Krishnan, MD, PhD; Christopher Cooper, MD; Wassim W. Labaki, MD; Victor E. Ortega, MD, PhD; J. Michael Wells, MD; Gerard J. Criner, MD; Prescott G. Woodruff, MD, MPH; Russell P. Bowler, MD, PhD; Cheryl S. Pirozzi, MD; Nadia N. Hansel, MD; Robert A. Wise, MD; Todd T. Brown, MD, PhD; and M. Bradley Drummond, MD, MHS; for the SPIROMICS Investigators*

CHEST 2020; 157(4):856-865

*Online supplements are not copyedited prior to posting and the author(s) take full responsibility for the accuracy of all data.*

e-Table 1. IRB approval numbers for study recruitment centers.

| Institution                            | Institutional Review Board Committee Name         | Approval Number        |
|----------------------------------------|---------------------------------------------------|------------------------|
| Columbia University                    | Columbia University IRB2                          | IRB-AAAE9315           |
| University of Iowa                     | University of Iowa Hawk IRB-01                    | 2013088719             |
| Johns Hopkins University               | Johns Hopkins IRB-5                               | NA_00035701/CR00018131 |
| University of California-Los Angeles   | UCLA Medical IRB 1                                | 10001740               |
| University of Michigan                 | University of Michigan IRBMED B1                  | HUM00036346            |
| National Jewish Health                 | National Jewish Health Institutional Review Board | 19970                  |
| University of California-San Francisco | UCSF IRB Parnassas Panel                          | 10-03196               |
| Temple University                      | Temple University IRB A2                          | 21416                  |
| University of Alabama at Birmingham    | University of Alabama at Birmingham IRB 2         | 120906004              |
| University of Illinois                 | University of Illinois IRB #3                     | 2013-0939              |
| University of Utah                     | University of Utah IRB Panel Review Board 5       | 00027298               |
| Wake Forest University                 | Wake Forest University IRB #5                     | 00012805               |

e-Table 2. Logistic regression modeling\* of associations between vitamin D and odds of COPD severe exacerbations in the year prior to enrollment

|                                            | Odds of Severe Exacerbation in Previous Year<br>(Continuous Vitamin D) |             |        | Odds of Severe Exacerbation in Previous Year<br>(Vitamin D Deficiency status) |             |        |
|--------------------------------------------|------------------------------------------------------------------------|-------------|--------|-------------------------------------------------------------------------------|-------------|--------|
|                                            | OR                                                                     | 95% CI      | P      | OR                                                                            | 95% CI      | P      |
| 25-OH-Vitamin D<br>(per 10 ng/ml decrease) | 1.06                                                                   | (0.3-1.20)  | 0.36   |                                                                               |             |        |
| 25-OH-Vitamin D<br>(<20 vs. ≥20 ng/ml)     |                                                                        |             |        | 1.38                                                                          | (0.98-1.93) | 0.06   |
| Age (per 10 years)                         | 0.54                                                                   | (0.44-0.66) | <0.001 | 0.55                                                                          | 0.45-0.67   | <0.001 |
| Female Sex                                 | 1.17                                                                   | (0.88-1.56) | 0.29   | 1.15                                                                          | 0.86-1.53   | 0.34   |
| African-American Race                      | 2.09                                                                   | (1.45-3.00) | <0.001 | 2.02                                                                          | 1.43-2.09   | <0.001 |
| Current Smoking                            | 0.54                                                                   | (0.39-0.76) | <0.001 | 0.53                                                                          | 0.38-0.74   | <0.001 |
| Pack Years Smoked (per 10 pack-years)      | 0.98                                                                   | (0.92-1.04) | 0.41   | 0.97                                                                          | 0.92-1.04   | 0.39   |
| Season                                     |                                                                        |             |        |                                                                               |             |        |
| Spring                                     | 0.84                                                                   | 0.56-1.27   | 0.51   | 0.84                                                                          | 0.56-1.27   | 0.47   |
| Summer                                     | 0.87                                                                   | 0.87-1.31   | 0.69   | 0.88                                                                          | 0.58-1.34   | 0.75   |
| Fall                                       | 0.95                                                                   | 0.63-1.42   | 0.75   | 0.96                                                                          | 0.64-1.44   | 0.71   |
| Winter                                     | (ref)                                                                  |             |        |                                                                               |             |        |

\* Adjusted for all covariates in table

e-Table 3. Logistic regression modeling\* of associations between vitamin D and odds of COPD exacerbations in the year after enrollment in the SPIROMICS cohort

|                                               | Odds of Exacerbation at One Year<br>(Continuous Vitamin D) |             |        | Odds of Exacerbation at One Year<br>(Vitamin D Deficiency status) |             |        |
|-----------------------------------------------|------------------------------------------------------------|-------------|--------|-------------------------------------------------------------------|-------------|--------|
|                                               | OR                                                         | 95% CI      | P      | OR                                                                | 95% CI      | P      |
| 25-OH-Vitamin D<br>(per 10 ng/ml<br>decrease) | 1.06                                                       | (0.61-1.18) | 0.28   |                                                                   |             |        |
| 25-OH-Vitamin D<br>(<20 vs. ≥20<br>ng/ml)     |                                                            |             |        | 1.14                                                              | (0.83-1.50) | 0.48   |
| Age (per 10 years)                            | 0.66                                                       | (0.56-0.78) | <0.001 | 0.66                                                              | (0.56-0.78) | <0.001 |
| Female Sex                                    | 1.56                                                       | (1.23-1.92) | <0.001 | 1.57                                                              | (1.21-1.95) | <0.001 |
| African-American<br>Race                      | 0.79                                                       | (0.55-1.14) | 0.19   | 0.80                                                              | (0.56-1.15) | 0.21   |
| Current Smoking                               | 0.60                                                       | (0.45-0.79) | <0.001 | 0.60                                                              | (0.46-0.79) | <0.001 |
| Pack Years<br>Smoked (per 10<br>pack-years)   | 1.01                                                       | (0.97-1.06) | 0.59   | 1.01                                                              | (0.97-1.06) | 0.58   |
| Season                                        |                                                            |             |        |                                                                   |             |        |
| Spring                                        | 0.82                                                       | (0.58-1.18) | 0.02   | 0.81                                                              | (0.57-1.16) | 0.02   |
| Summer                                        | 1.12                                                       | (0.79-1.58) | 0.50   | 1.11                                                              | (0.78-1.57) | 0.51   |
| Fall                                          | 1.29                                                       | (0.92-1.82) | 0.03   | 1.29                                                              | (0.91-1.81) | 0.03   |
| Winter                                        | (ref)                                                      |             |        |                                                                   |             |        |

\* Adjusted for all covariates in table

e-Table 4. Logistic regression modeling\* of associations between vitamin D and odds of severe COPD exacerbations in the year after enrollment in the SPIROMICS cohort

|                                            | Odds of Severe Exacerbation at One Year<br>(Continuous Vitamin D) |             |       | Odds of Severe Exacerbation at One Year<br>(Vitamin D Deficiency status) |             |        |
|--------------------------------------------|-------------------------------------------------------------------|-------------|-------|--------------------------------------------------------------------------|-------------|--------|
|                                            | OR                                                                | 95% CI      | P     | OR                                                                       | 95% CI      | P      |
| 25-OH-Vitamin D<br>(per 10 ng/ml decrease) | 1.09                                                              | (0.93-1.27) | 0.34  |                                                                          |             |        |
| 25-OH-Vitamin D<br>(<20 vs. ≥20 ng/ml)     |                                                                   |             |       | 0.87                                                                     | (0.56-1.36) | 0.55   |
| Age (per 10 years)                         | 0.67                                                              | (0.53-0.85) | 0.001 | 0.51                                                                     | (0.52-0.83) | <0.001 |
| Female Sex                                 | 1.38                                                              | (0.97-1.97) | 0.23  | 1.37                                                                     | (0.96-1.94) | 0.08   |
| African-American Race                      | 1.43                                                              | (0.89-2.28) | 0.64  | 1.55                                                                     | (0.97-2.48) | 0.53   |
| Current Smoking                            | 0.70                                                              | (0.47-1.05) | 0.08  | 0.72                                                                     | (0.48-1.07) | 0.10   |
| Pack Years Smoked<br>(per 10 pack-years)   | 1.02                                                              | (0.96-1.10) | 0.50  | 1.03                                                                     | (0.96-1.94) | 0.46   |
| Season                                     |                                                                   |             |       |                                                                          |             |        |
| Spring                                     | 0.59                                                              | (0.33-1.04) | 0.16  | 0.57                                                                     | (0.32-1.01) | 0.004  |
| Summer                                     | 1.21                                                              | (0.73-1.98) | 0.60  | 1.16                                                                     | (0.71-1.91) | 0.19   |
| Fall                                       | 1.30                                                              | (0.80-2.13) | 1.33  | 1.27                                                                     | (0.78-2.06) | 0.05   |
| Winter                                     | (ref)                                                             |             |       |                                                                          |             |        |

\* Adjusted for all covariates in table

e-Table 5. Comparison of point estimates of multivariable models with full cohort versus restriction to participants not reporting vitamin D supplementation

|                                                    | Full Cohort<br>(N=1609) |       | No Vitamin D Supplementation<br>(N=1226) |       |
|----------------------------------------------------|-------------------------|-------|------------------------------------------|-------|
|                                                    | Estimate*               | P     | Estimate*                                | P     |
| <b>Continuous Vitamin D</b>                        |                         |       |                                          |       |
| Baseline FEV <sub>1</sub> % predicted              | -1.04                   | 0.03  | -2.16                                    | 0.004 |
| Annual FEV <sub>1</sub> % predicted rate of change | -0.19                   | 0.28  | -0.20                                    | 0.39  |
| Any AECOPD in prior year                           | 1.11                    | 0.04  | 1.02                                     | 0.02  |
| Any severe AECOPD in prior year                    | 1.06                    | 0.36  | 0.99                                     | 0.16  |
| Any AECOPD at one year                             | 1.06                    | 0.28  | 0.99                                     | 0.13  |
| Any severe AECOPD at prior year                    | 1.09                    | 0.34  | 0.99                                     | 0.30  |
| <b>Vitamin D &lt;20 vs. ≥20 ng/ml</b>              |                         |       |                                          |       |
| Baseline FEV <sub>1</sub> % predicted              | -4.11                   | 0.004 | -4.46                                    | 0.003 |
| Annual FEV <sub>1</sub> % predicted rate of change | -1.27                   | 0.02  | -1.05                                    | 0.09  |
| Any AECOPD in prior year                           | 1.32                    | 0.049 | 1.43                                     | 0.02  |
| Any severe AECOPD in prior year                    | 1.38                    | 0.06  | 1.40                                     | 0.07  |
| Any AECOPD at one year                             | 1.14                    | 0.48  | 1.12                                     | 0.48  |
| Any severe AECOPD at prior year                    | 0.87                    | 0.55  | 0.86                                     | 0.53  |

Adjusted for all covariates as described in methods and main tables.

\*Estimates from linear regression for FEV<sub>1</sub>% predicted models and logistic regression (odds ratio) for exacerbation models.
